# Supplementary material for: Fluorometric sensor based on bisterpyridine metallopolymer: detection of cyanide and phosphates in water
Source: Royal Society of Chemistry journal article supplement (doi:10.1039/c2an35119f), 2012-01-01
Supplement: c2an35119f.pdf [file c2an35119f.pdf]

## Supporting information for:

# Fluorometric sensor based on *bisterpyridine* metallopolymer: Detection of cyanide and phosphates in water.

*Andreas Wild, Andreas Winter, Martin D. Hager, Ulrich S. Schubert\**

Laboratory of Organic and Macromolecular Chemistry (IOMC), Friedrich-Schiller-University Jena,  
Humboldtstr. 10, D-07743 Jena, Germany.

Jena Center for Soft Matter (JCSM), Humboldtstr. 10, D-07743 Jena, Germany.

Dutch Polymer Institute (DPI), P.O. Box 902, 5600 AX Eindhoven, The Netherlands.

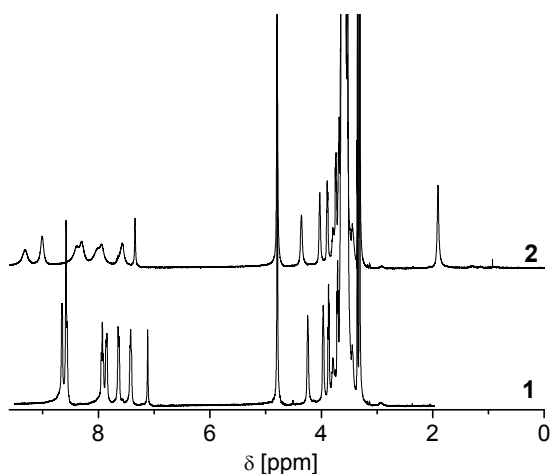

Figure S1. <sup>1</sup>H NMR (CD<sub>3</sub>OD, 400 MHz) of **1** and **2**.

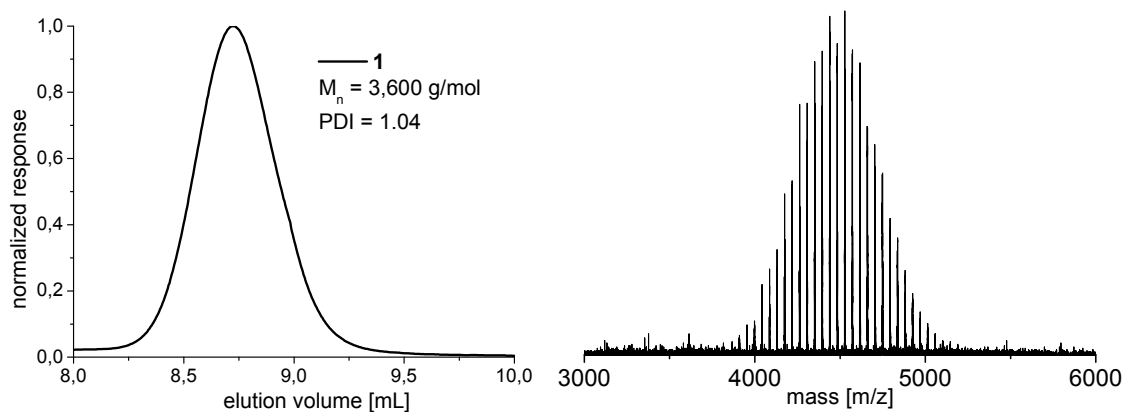

Figure S2. Left: SEC trace of **1**. Right: MALDI-TOF MS spectrum of **1**.

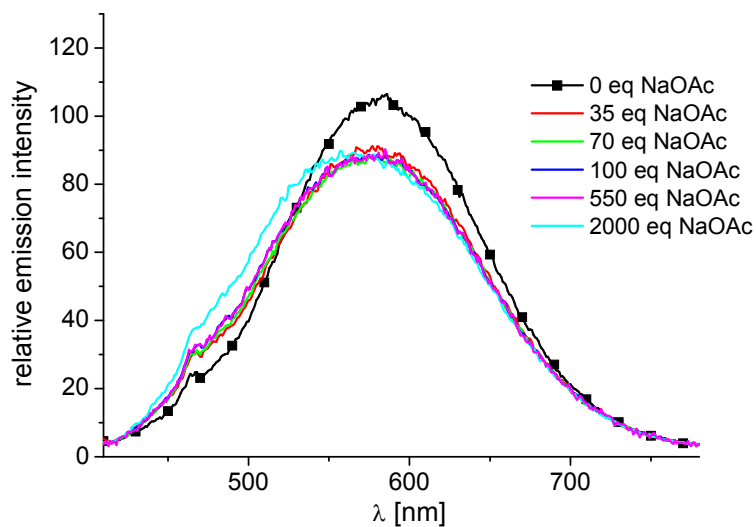

Figure S3. Emission spectra of **2** (water,  $c = 5.8 \times 10^{-8}$  M,  $\lambda_{\text{ex}} = 400$  nm) upon addition of NaOAc (water,  $c = 11.6 \mu\text{M}$  or  $0.116$  mM).

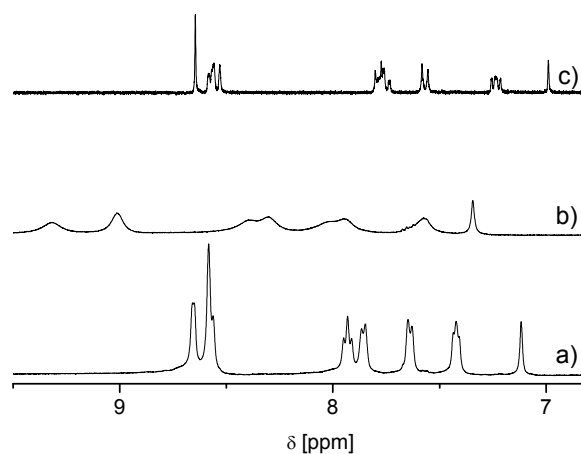

Figure S4.  $^1\text{H}$  NMR a) **1** ( $\text{CD}_3\text{OD}$ , 400 MHz), b) **2** ( $\text{CD}_3\text{OD}$ , 400 MHz), c) **2** upon addition of 50 equivalents  $\text{Na}_3\text{PO}_4$  ( $\text{D}_2\text{O}$ , 200 MHz).

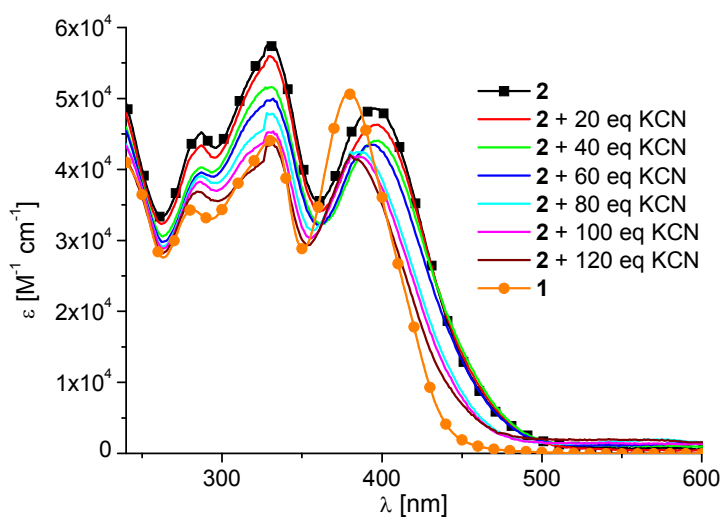

Figure S5. UV-Vis absorption spectra ( $10^{-6}$  M, water) of **1** and **2**, upon addition of KCN.

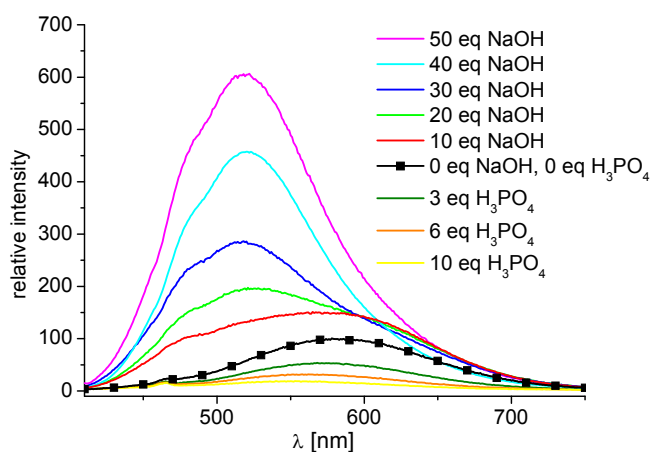

Figure S6. Emission spectra of **2** (water,  $c = 5.8 \times 10^{-8}$  M,  $\lambda_{\text{ex}} = 400$  nm) upon addition of NaOH or  $\text{H}_3\text{PO}_4$  (water,  $c = 11.6$   $\mu\text{M}$ ).

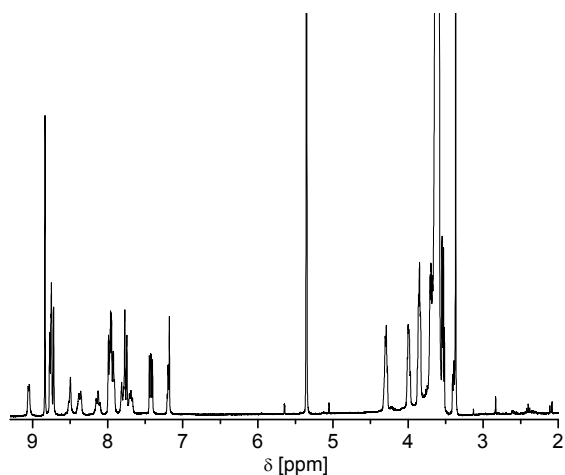

Figure S7.  $^1\text{H}$  NMR ( $\text{CD}_2\text{Cl}_2$ , 300 MHz) of **2** upon addition of one equivalent NaOH.

### Calculation of the dissociation constants

The dissociation constants for the complex  $\text{AB}_n$  of analyte (B) by fluorophore (A) were calculated from Eq. S1.<sup>1,2</sup>

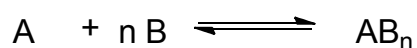

$$K_d^n = \frac{[\text{A}][\text{B}]^n}{[\text{AB}_n]} \quad (\text{Eq. S1})$$

When  $[\text{A}]_0 = [\text{A}] + [\text{AB}_n]$  is the initial concentration of A and  $[\text{B}]_0$  the initial concentration of B.

Therefore:

$$K_d^n = \frac{([\text{A}]_0 - [\text{AB}_n])[\text{B}]^n}{[\text{AB}_n]} \quad \text{and} \quad [\text{AB}_n] = \frac{[\text{A}]_0[\text{B}]^n}{K_d^n + [\text{B}]^n} \quad (\text{Eq. S2})$$

If  $I_A$  and  $I_{\text{AB}_n}$  are the proportional constants for the fluorescence intensity:

$$F_0 = I_A[\text{A}]_0 \quad \text{and} \quad F_{\text{end}} = I_{\text{AB}_n}[\text{A}]_0$$

$$\begin{aligned}
 F_x &= I_A[A] + I_{AB_n}[AB_n] \\
 &= I_A([A_0] - [AB_n]) + I_{AB_n}[AB_n] \\
 &= I_A[A_0] + (I_{AB_n} - I_A)[AB_n] \\
 &= I_A[A_0] + (I_{AB_n} - I_A) \frac{[A_0][B]^n}{K_d^n + [B]^n} \\
 &= F_0 + \frac{(F_{end} - F_0)[B]^n}{K_d^n + [B]^n}
 \end{aligned}
 \tag{Eq. S3}$$

What can also be written as Eq. 1 or Eq. S4.

$$\frac{F_0 - F_x}{F_x - F_{end}} = \left( \frac{[B]}{K_d} \right)^n
 \tag{Eq. S4}$$

The plot of  $\log\left\{\frac{F_0 - F_x}{F_x - F_{end}}\right\}$  vs.  $\log[B]$  provides the binding sites  $n$  (from the slope) and the value of  $\log[B]$  at  $\log\left\{\frac{F_0 - F_x}{F_x - F_{end}}\right\} = 0$  gives  $\log(K_d)$ .<sup>1</sup>

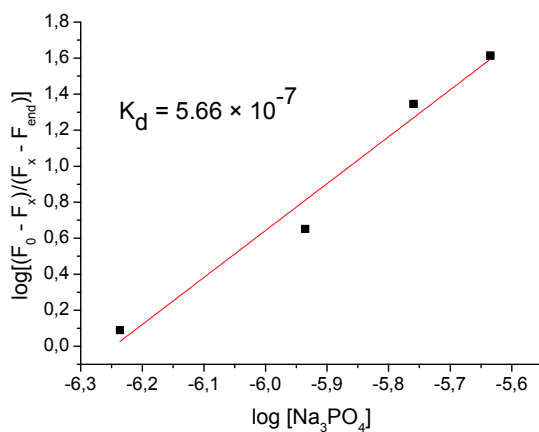

Figure S8. Double-logarithmic plot for the spectral change of **2** (water,  $c = 5.8 \times 10^{-8}$  M,  $\lambda_{ex} = 400$  nm) upon addition of Na<sub>3</sub>PO<sub>4</sub> (water,  $c = 11.6$  μM).

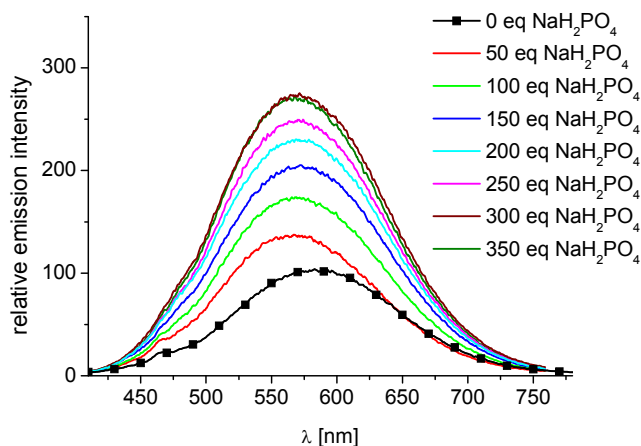

Figure S9. Emission spectra of **2** (water,  $c = 5.8 \times 10^{-8}$  M,  $\lambda_{\text{ex}} = 400$  nm) upon addition of  $\text{NaH}_2\text{PO}_4$  (water,  $c = 11.6 \mu\text{M}$  or  $0.116$  mM).

Most important for an efficient phosphate complexation is the pH value of the solution. A comparison of  $\text{Na}_3\text{PO}_4$ ,  $\text{Na}_2\text{HPO}_4$  and  $\text{NaH}_2\text{PO}_4$  reveals clear differences (Figures 2, 3 and 4).  $\text{Na}_3\text{PO}_4$  as well as  $\text{Na}_2\text{HPO}_4$  possess the ability to complex  $\text{Zn}^{\text{II}}$  and, therefore, enable a decomplexation of the  $\text{Zn}^{\text{II}}$  terpyridine complex. In contrast,  $\text{NaH}_2\text{PO}_4$  behaves like most of the other ions, just coordinates to  $\text{Zn}^{\text{II}}$  and, consequently, does not shift the emission wavelength (Figure S9). This knowledge enables a clear distinction between the “alkaline” phosphates ( $\text{Na}_3\text{PO}_4$  and  $\text{Na}_2\text{HPO}_4$ ) as well as  $\text{NaH}_2\text{PO}_4$  and, thereby, for a given phosphate concentration, estimation of the pH value.

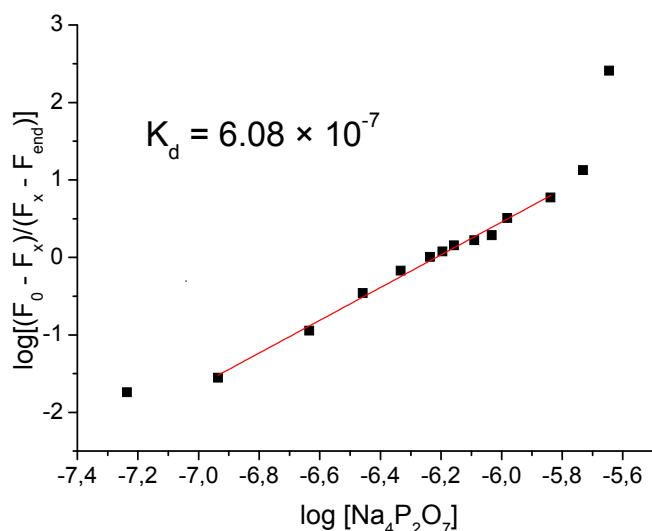

Figure S10. Double-logarithmic plot for the spectral change of **2** (water,  $c = 5.8 \times 10^{-8}$  M,  $\lambda_{\text{ex}} = 400$  nm) upon addition of  $\text{Na}_4\text{P}_2\text{O}_7$  (water,  $c = 11.6 \mu\text{M}$ ).

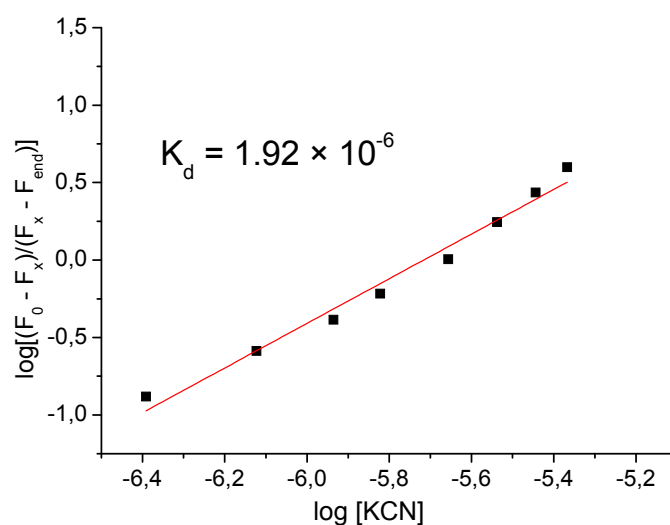

Figure S11. Double-logarithmic plot for the spectral change of **2** (water,  $c = 5.8 \times 10^{-8}$  M,  $\lambda_{\text{ex}} = 400$  nm) upon addition of KCN (water,  $c = 11.6$   $\mu\text{M}$ ).

Table S1. Overview about the composition of tab water from Jena, Germany.<sup>3</sup>

|           | c      | c                     | equivalents <sup>a</sup> |
|-----------|--------|-----------------------|--------------------------|
|           | [mg/l] | [M]                   |                          |
| phosphate | 0.1    | $1.0 \times 10^{-6}$  | 17                       |
| chloride  | 15.3   | $4.4 \times 10^{-4}$  | 7586                     |
| nitrite   | 0.002  | $4.3 \times 10^{-8}$  | 1                        |
| nitrate   | 5.28   | $8.5 \times 10^{-5}$  | 1466                     |
| ammonium  | <0.02  | $<1.1 \times 10^{-6}$ | <19                      |
| fluoride  | 0.11   | $5.8 \times 10^{-6}$  | 100                      |
| iron      | 0.01   | $1.7 \times 10^{-7}$  | 3                        |
| manganese | <0.01  | $<1.8 \times 10^{-7}$ | 3                        |
| potassium | 4.55   | $1.8 \times 10^{-4}$  | 3100                     |
| sodium    | 10.9   | $4.7 \times 10^{-4}$  | 8103                     |
| uranium   | 0.0061 | $2.6 \times 10^{-8}$  | 0.45                     |

a) Equivalents in comparison to concentration of **2** ( $5.8 \times 10^{-8}$  M).

1. P. Das, A. Ghosh, M. K. Kesharwani, V. Ramu, B. Ganguly and A. Das, *Eur. J. Inorg. Chem.*, 2011, 3050-3058.
2. Personal message, Prof. Dr. Shin Mizukami (smizukami@mls.eng.osaka-u.ac.jp).
3. <http://www.jenawasser.de/PDF/TWAnalyseBurgau.pdf> (25. 01. 2012).
